# Supplementary material for: Mechanism of Seasonal Arctic Sea Ice Evolution and Arctic Amplification
Source: Copernicus journal article supplement (doi:10.5194/tc-2016-69), 2016-04-29
Supplement: Supplementary file 1 [file tc-2016-69-supplement.pdf]

# Supplementary Figures

## Mechanism of Seasonal Arctic Sea Ice Evolution and Arctic Amplification

Kwang-Yul Kim<sup>1\*</sup>, Benjamin D. Hamlington<sup>2</sup>, Hanna Na<sup>3</sup>, and Jinju Kim<sup>1</sup>

5 <sup>1</sup>School of Earth and Environmental Sciences, Seoul National University, Seoul 151-742, Republic of Korea

<sup>2</sup>Department of Ocean, Earth and Atmospheric Sciences, Old Dominion University, Norfolk, Virginia 23529, United States of America

<sup>3</sup>Ocean Circulation and Climate Research Center, Korea Institute of Ocean Science and Technology, Ansan, 15627, Republic of Korea

10 *Correspondence to:* Kwang-Yul Kim (kwang56@snu.ac.kr)

**a** 850 hPa T (0.2 C) & SAT (0.5 C)

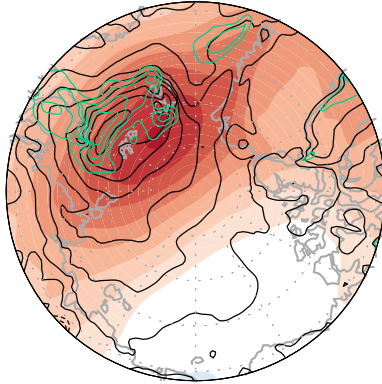

**b** TCC (0.5 %)

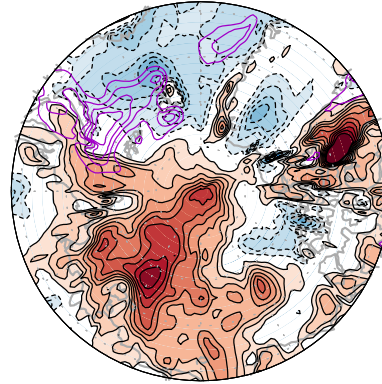

**c** DLW and ULW at SFC (2 W/m<sup>2</sup>)

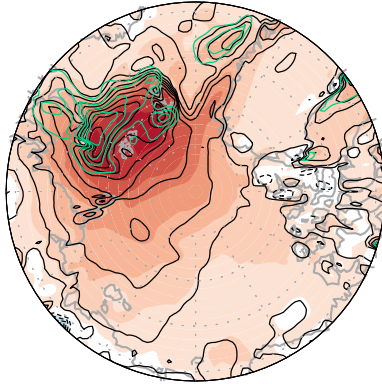

**d** SH (0.02 g/kg) and DLW (2 W/m<sup>2</sup>)

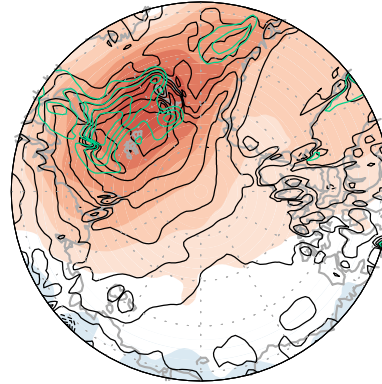

**Figure S1.** The DJF patterns of 850 hPa air temperature (shading) and 2 m air temperature (contour) (a), total cloud cover (b), downward (shade) and upward (contour) longwave radiation at surface (c), and 900-hPa specific humidity (shade) and downward longwave radiation at surface (contour) (d) for the warming mode. The green and purple contours in (a)-(d) represent the reduction of sea ice concentration.

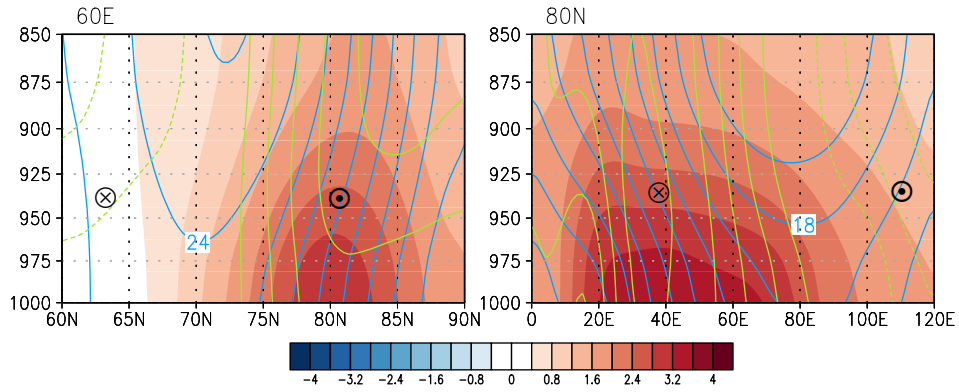

925 hPa AIR T & GPH

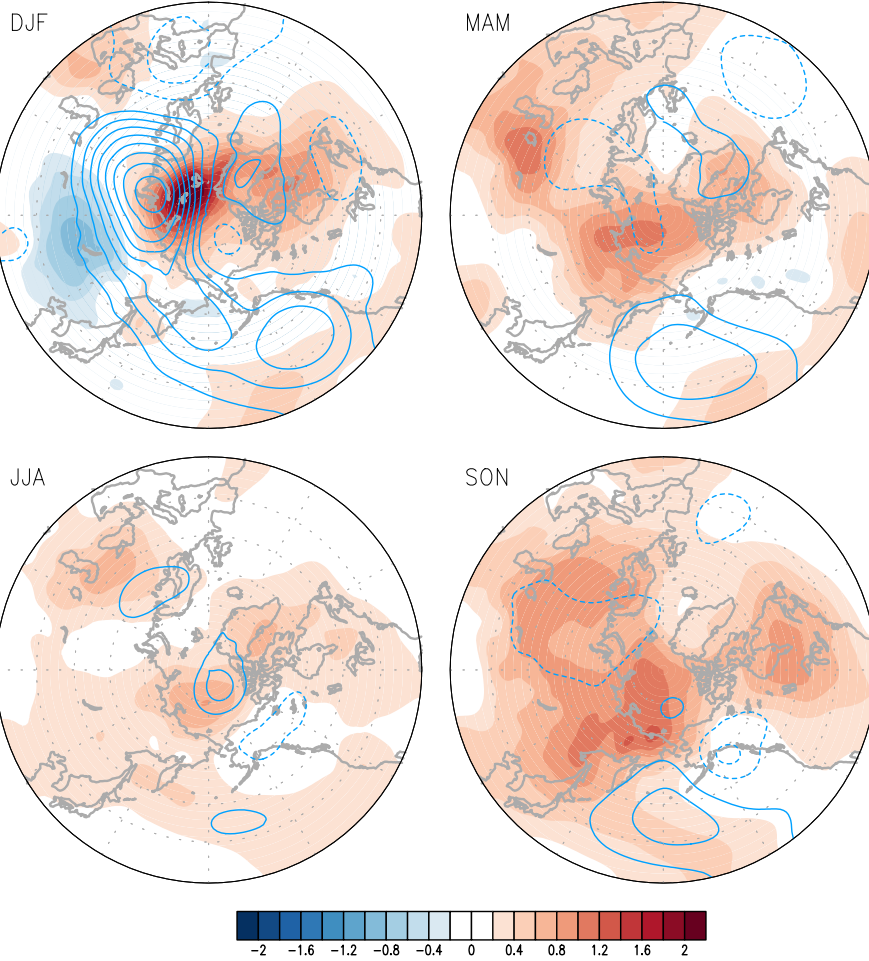

**Figure S2.** (upper panels) Vertical section of temperature (shading; 0.4 K), geopotential height (blue contours; 3 m), and zonal (left) and meridional (right) winds (yellow contours; 0.2 m s<sup>-1</sup>). (lower panels) Air temperatures (shading; 0.2 K) and geopotential height (contours; 3 m) at 925 hPa level. The domain of the plot is 30°-90° N.
